# Supplementary material for: VprBP/DCAF1 Triggers Melanomagenic Gene Silencing through Histone H2A Phosphorylation
Source: MDPI journal article supplement (doi:10.3390/biomedicines11092552), 2023-09-17
Supplement: s1 [file s1]

**List of enriched Gene Ontology (GO) terms for the up-regulated genes  
from VprBP knockdown cells.**

**GO:Biological Process**

| <b>ID</b>  | <b>GeneRatio</b> | <b>pvalue</b> | <b>p.adjust</b> | <b>qvalue</b> | <b>Count</b> |
|------------|------------------|---------------|-----------------|---------------|--------------|
| GO:0044281 | 139/963          | 1.17E-06      | 4.08E-03        | 4.08E-03      | 139          |
| GO:0006082 | 83/963           | 1.76E-06      | 4.08E-03        | 4.08E-03      | 83           |
| GO:0043436 | 82/963           | 2.46E-06      | 4.08E-03        | 4.08E-03      | 82           |
| GO:0019752 | 77/963           | 1.71E-05      | 2.12E-02        | 2.12E-02      | 77           |

**GO:Cellular Component**

| <b>ID</b>  | <b>GeneRatio</b> | <b>pvalue</b> | <b>p.adjust</b> | <b>qvalue</b> | <b>Count</b> |
|------------|------------------|---------------|-----------------|---------------|--------------|
| GO:0005739 | 138/1008         | 3.53E-09      | 2.17E-06        | 2.15E-06      | 138          |
| GO:0019866 | 51/1008          | 3.98E-05      | 1.22E-02        | 1.21E-02      | 51           |
| GO:0031966 | 62/1008          | 8.57E-05      | 1.76E-02        | 1.74E-02      | 62           |
| GO:0005743 | 45/1008          | 1.33E-04      | 2.05E-02        | 2.03E-02      | 45           |
| GO:0005759 | 43/1008          | 2.57E-04      | 2.91E-02        | 2.89E-02      | 43           |
| GO:0005740 | 63/1008          | 2.84E-04      | 2.91E-02        | 2.89E-02      | 63           |

**GO:Molecular Function**

| <b>ID</b>  | <b>GeneRatio</b> | <b>pvalue</b> | <b>p.adjust</b> | <b>qvalue</b> | <b>Count</b> |
|------------|------------------|---------------|-----------------|---------------|--------------|
| GO:0003700 | 165/1013         | 1.09E-20      | 1.01E-17        | 9.75E-18      | 165          |
| GO:0000981 | 159/1013         | 8.40E-20      | 3.89E-17        | 3.76E-17      | 159          |
| GO:0000977 | 160/1013         | 1.04E-18      | 3.20E-16        | 3.09E-16      | 160          |
| GO:0003690 | 179/1013         | 1.40E-18      | 3.24E-16        | 3.13E-16      | 179          |
| GO:1990837 | 171/1013         | 2.24E-18      | 4.16E-16        | 4.02E-16      | 171          |
| GO:0043565 | 177/1013         | 8.60E-18      | 1.14E-15        | 1.11E-15      | 177          |
| GO:0000976 | 165/1013         | 8.71E-18      | 1.14E-15        | 1.11E-15      | 165          |
| GO:0001067 | 165/1013         | 9.88E-18      | 1.14E-15        | 1.11E-15      | 165          |
| GO:0140110 | 186/1013         | 8.42E-15      | 8.67E-13        | 8.38E-13      | 186          |
| GO:0000978 | 120/1013         | 1.52E-10      | 1.40E-08        | 1.36E-08      | 120          |
| GO:0000987 | 120/1013         | 4.41E-10      | 3.71E-08        | 3.59E-08      | 120          |
| GO:0016788 | 72/1013          | 3.40E-06      | 2.63E-04        | 2.54E-04      | 72           |
| GO:0030170 | 12/1013          | 3.47E-05      | 2.48E-03        | 2.39E-03      | 12           |
| GO:0070279 | 12/1013          | 4.20E-05      | 2.78E-03        | 2.69E-03      | 12           |
| GO:0001227 | 35/1013          | 1.01E-04      | 6.23E-03        | 6.02E-03      | 35           |
| GO:0001217 | 35/1013          | 1.29E-04      | 7.46E-03        | 7.21E-03      | 35           |
