# Supplementary material for: VprBP/DCAF1 Triggers Melanomagenic Gene Silencing through Histone H2A Phosphorylation
Source: MDPI journal article supplement (doi:10.3390/biomedicines11092552), 2023-09-17
Supplement: s1 [file s1]

## Gene expression profiling

| Gene name | FDR step up (KD vs Cont) | Fold change (KD vs Cont) |
|-----------|--------------------------|--------------------------|
| AKAP6     | 1.73E-08                 | 9.37E+00                 |
| NKD1      | 4.00E-08                 | 2.09E+01                 |
| SLC6A14   | 4.08E-08                 | 1.81E+01                 |
| TEX9      | 5.15E-08                 | 1.54E+01                 |
| MAFB      | 6.37E-08                 | 1.82E+01                 |
| SULT1A1   | 6.95E-08                 | 1.76E+01                 |
| ATP6V1B1  | 9.30E-08                 | 1.70E+01                 |
| FZD4      | 9.69E-08                 | 5.26E+00                 |
| PLEKHG4B  | 1.08E-07                 | 8.06E+00                 |
| PLAA      | 1.09E-07                 | 8.83E+00                 |
| PAIP2B    | 1.09E-07                 | 5.26E+00                 |
| STK36     | 1.15E-07                 | 6.86E+00                 |
| MINDY1    | 1.26E-07                 | 6.55E+00                 |
| TBC1D30   | 1.35E-07                 | 1.08E+01                 |
| HYLS1     | 1.44E-07                 | 6.56E+00                 |
| FAAH      | 1.51E-07                 | 4.87E+00                 |
| IL20RA    | 1.52E-07                 | 7.01E+00                 |
| H2BC12    | 1.53E-07                 | 7.00E+00                 |
| SLC25A45  | 1.71E-07                 | 1.05E+01                 |
| DGCR6     | 1.71E-07                 | 4.60E+00                 |
| ZNF32     | 1.73E-07                 | 1.09E+01                 |
| SMPDL3B   | 1.74E-07                 | 6.00E+00                 |
| EFNA5     | 1.78E-07                 | 3.77E+00                 |
| NREP      | 1.87E-07                 | 7.20E+00                 |
| PPFIBP2   | 1.87E-07                 | 1.08E+01                 |
| TMEM156   | 1.91E-07                 | 7.54E+00                 |
| CYP20A1   | 2.02E-07                 | 1.23E+01                 |
| LYPD6B    | 2.02E-07                 | 3.87E+00                 |
| HES6      | 2.11E-07                 | 1.19E+01                 |
| SYNJ1     | 2.15E-07                 | 7.00E+00                 |
| TESMIN    | 2.38E-07                 | 1.06E+01                 |
| MAP2      | 2.48E-07                 | 5.63E+00                 |
| MXD3      | 2.51E-07                 | 5.05E+00                 |
| NQO2      | 2.53E-07                 | 4.54E+00                 |
| TMEM139   | 2.58E-07                 | 6.58E+00                 |
| ZNF778    | 2.64E-07                 | 6.69E+00                 |
| CYP2J2    | 2.79E-07                 | 5.27E+00                 |
| MPPE1     | 2.81E-07                 | 3.38E+00                 |

|                 |          |          |
|-----------------|----------|----------|
| SCAMP5          | 2.90E-07 | 7.08E+00 |
| RALGPS1         | 2.92E-07 | 4.87E+00 |
| ENSG00000248538 | 2.94E-07 | 9.55E+00 |
| HDHD3           | 3.22E-07 | 3.80E+00 |
| INPP5J          | 3.28E-07 | 5.61E+00 |
| MPZL3           | 3.31E-07 | 4.27E+00 |
| GCDH            | 3.31E-07 | 3.68E+00 |
| LRRC37A4P       | 3.38E-07 | 6.47E+00 |
| SETD6           | 3.49E-07 | 2.39E+01 |
| ALPK3           | 3.49E-07 | 7.35E+00 |
| TMEM170B        | 3.57E-07 | 1.01E+01 |
| ODC1            | 3.59E-07 | 5.56E+00 |
| ZNF253          | 3.59E-07 | 7.36E+00 |
| PKD1L2          | 3.59E-07 | 8.27E+00 |
| ACCS            | 3.60E-07 | 4.80E+00 |
| ERMAP           | 3.64E-07 | 4.38E+00 |
| THYN1           | 3.67E-07 | 3.62E+00 |
| DTWD2           | 3.70E-07 | 7.97E+00 |
| C11orf54        | 3.73E-07 | 4.51E+00 |
| L3MBTL2         | 3.73E-07 | 3.41E+00 |
| SRR             | 3.80E-07 | 8.05E+00 |
| FGFR4           | 3.86E-07 | 1.17E+01 |
| VWA2            | 3.89E-07 | 6.87E+00 |
| CENPV           | 3.90E-07 | 7.25E+00 |
| TTC12           | 3.93E-07 | 8.88E+00 |
| RAB24           | 3.95E-07 | 4.74E+00 |
| EPB41L4A-AS1    | 3.98E-07 | 4.27E+00 |
| CFAP410         | 4.00E-07 | 6.65E+00 |
| BCKDHB          | 4.04E-07 | 3.63E+00 |
| HDHD2           | 4.06E-07 | 6.28E+00 |
| NEBL            | 4.09E-07 | 3.53E+00 |
| RASSF1          | 4.16E-07 | 3.71E+00 |
| KLF8            | 4.18E-07 | 3.13E+00 |
| TMEM135         | 4.19E-07 | 3.63E+00 |
| KRCC1           | 4.25E-07 | 4.34E+00 |
| FAM117B         | 4.26E-07 | 4.00E+00 |
| ENDOV           | 4.38E-07 | 4.30E+00 |
| FAM171B         | 4.41E-07 | 3.45E+00 |
| RWDD2B          | 4.45E-07 | 3.59E+00 |
| PCDHA11         | 4.55E-07 | 8.47E+00 |

|          |          |          |
|----------|----------|----------|
| PER3     | 4.59E-07 | 5.09E+00 |
| RPUSD4   | 4.60E-07 | 3.27E+00 |
| RTKN2    | 4.88E-07 | 6.17E+00 |
| SLC2A11  | 4.93E-07 | 5.31E+00 |
| ABCG1    | 5.03E-07 | 6.99E+00 |
| DENND1B  | 5.24E-07 | 3.21E+00 |
| ZFP62    | 5.29E-07 | 3.92E+00 |
| ZADH2    | 5.37E-07 | 4.08E+00 |
| SMAD6    | 5.38E-07 | 5.22E+00 |
| HCG11    | 5.53E-07 | 8.82E+00 |
| TMEM144  | 5.64E-07 | 8.06E+00 |
| C19orf54 | 5.75E-07 | 3.30E+00 |
| PNPLA8   | 5.85E-07 | 3.79E+00 |
| SLC25A14 | 5.85E-07 | 4.97E+00 |
| S1PR2    | 5.96E-07 | 4.66E+00 |
| EFS      | 6.00E-07 | 5.10E+00 |
| BICDL2   | 6.23E-07 | 1.71E+01 |
| KAZALD1  | 6.43E-07 | 2.43E+01 |
| MTG1     | 6.45E-07 | 3.24E+00 |
| ALDH6A1  | 6.53E-07 | 3.41E+00 |
| FAM118B  | 6.53E-07 | 4.36E+00 |
| DOCK11   | 6.68E-07 | 8.29E+00 |
| ARHGAP33 | 6.93E-07 | 4.47E+00 |
| NXPH4    | 7.04E-07 | 6.61E+00 |
| ICA1     | 7.05E-07 | 1.95E+01 |
| SYTL4    | 7.12E-07 | 3.58E+00 |
| TCTA     | 7.18E-07 | 8.03E+00 |
| CISH     | 7.18E-07 | 1.20E+01 |
| SMAD1    | 7.29E-07 | 3.56E+00 |
| LIG4     | 7.36E-07 | 4.61E+00 |
| OARD1    | 7.76E-07 | 3.64E+00 |
| NDUFV3   | 7.87E-07 | 2.90E+00 |
| OSGEP    | 8.45E-07 | 4.68E+00 |
| OPHN1    | 8.48E-07 | 4.76E+00 |
| DTNBP1   | 8.56E-07 | 3.74E+00 |
| TLR6     | 8.58E-07 | 6.01E+00 |
| SLC16A14 | 8.62E-07 | 6.24E+00 |
| HOXC11   | 8.66E-07 | 4.87E+00 |
| EXPH5    | 8.85E-07 | 7.81E+00 |
| PARD3B   | 9.42E-07 | 6.73E+00 |

|                 |          |          |
|-----------------|----------|----------|
| DIXDC1          | 9.46E-07 | 3.94E+00 |
| P2RY11          | 9.56E-07 | 5.68E+00 |
| SLC4A8          | 9.70E-07 | 8.50E+00 |
| AGA             | 1.02E-06 | 3.96E+00 |
| PCBD2           | 1.03E-06 | 5.02E+00 |
| KCTD18          | 1.06E-06 | 3.16E+00 |
| SPAG16          | 1.07E-06 | 4.30E+00 |
| ZNF75D          | 1.08E-06 | 4.95E+00 |
| GAS8            | 1.08E-06 | 4.31E+00 |
| ENSG00000231187 | 1.09E-06 | 3.90E+00 |
| CCDC149         | 1.10E-06 | 7.98E+00 |
| ERVK3-1         | 1.10E-06 | 2.89E+00 |
| NTN1            | 1.10E-06 | 7.59E+00 |
| ORMDL1          | 1.10E-06 | 3.91E+00 |
| ALMS1           | 1.11E-06 | 2.77E+00 |
| YJEFN3          | 1.11E-06 | 5.71E+00 |
| SLC38A7         | 1.11E-06 | 3.61E+00 |
| AMIGO1          | 1.12E-06 | 8.21E+00 |
| THNSL2          | 1.14E-06 | 1.45E+01 |
| PEX11A          | 1.18E-06 | 7.86E+00 |
| ZNF346          | 1.18E-06 | 3.16E+00 |
| MYB             | 1.21E-06 | 1.20E+01 |
| MANSC1          | 1.21E-06 | 2.79E+00 |
| CYP27A1         | 1.21E-06 | 6.27E+00 |
| ZFAND2B         | 1.22E-06 | 3.41E+00 |
| SDSL            | 1.23E-06 | 5.17E+00 |
| POLH            | 1.26E-06 | 3.19E+00 |
| C6orf47         | 1.28E-06 | 2.95E+00 |
| MSL3P1          | 1.30E-06 | 5.51E+00 |
| ZNF184          | 1.34E-06 | 4.41E+00 |
| ZFAND2A         | 1.34E-06 | 6.76E+00 |
| TTLL1           | 1.36E-06 | 7.15E+00 |
| CARD8           | 1.37E-06 | 3.63E+00 |
| ZSWIM7          | 1.38E-06 | 4.28E+00 |
| CHMP4A          | 1.39E-06 | 2.77E+00 |
| COX20           | 1.39E-06 | 5.81E+00 |
| PPP1R3C         | 1.40E-06 | 6.13E+00 |
| SIPA1L2         | 1.41E-06 | 5.93E+00 |
| THTPA           | 1.41E-06 | 4.76E+00 |
| ABHD11          | 1.43E-06 | 5.99E+00 |

|                         |          |          |
|-------------------------|----------|----------|
| MOSPD1                  | 1.43E-06 | 4.09E+00 |
| NME3                    | 1.44E-06 | 4.68E+00 |
| CDK5                    | 1.45E-06 | 3.30E+00 |
| SCNN1D                  | 1.46E-06 | 6.17E+00 |
| DENND2D                 | 1.47E-06 | 3.94E+00 |
| LMX1B                   | 1.49E-06 | 4.49E+00 |
| MPC1                    | 1.49E-06 | 6.51E+00 |
| C10orf95-AS1            | 1.51E-06 | 4.45E+00 |
| TMEM18                  | 1.59E-06 | 3.00E+00 |
| TNFRSF11A               | 1.60E-06 | 5.19E+00 |
| SRCIN1                  | 1.61E-06 | 8.39E+00 |
| SLC25A33                | 1.63E-06 | 4.13E+00 |
| HMOX1                   | 1.67E-06 | 4.59E+00 |
| TRIM39                  | 1.68E-06 | 2.71E+00 |
| MRPL57                  | 1.69E-06 | 2.45E+00 |
| CYB5RL                  | 1.72E-06 | 3.22E+00 |
| EOLA1                   | 1.73E-06 | 4.59E+00 |
| SUGT1P4-STRA6LP-CCDC180 | 1.75E-06 | 5.49E+00 |
| PPM1H                   | 1.79E-06 | 3.86E+00 |
| RNF152                  | 1.84E-06 | 5.57E+00 |
| PAFAH2                  | 1.85E-06 | 3.70E+00 |
| TCHP                    | 1.86E-06 | 2.63E+00 |
| TCEAL3                  | 1.86E-06 | 3.30E+00 |
| PGM2L1                  | 1.87E-06 | 3.09E+00 |
| TP53I3                  | 1.88E-06 | 6.90E+00 |
| PRADC1                  | 1.88E-06 | 3.20E+00 |
| ARHGAP26                | 1.89E-06 | 3.41E+00 |
| ABHD5                   | 1.91E-06 | 3.46E+00 |
| RHPN1                   | 1.92E-06 | 1.78E+01 |
| BARD1                   | 1.93E-06 | 2.92E+00 |
| C1orf216                | 1.94E-06 | 4.68E+00 |
| ABCD1                   | 1.95E-06 | 6.51E+00 |
| MC1R                    | 1.95E-06 | 3.05E+00 |
| HNMT                    | 1.97E-06 | 9.98E+00 |
| KIAA0895L               | 2.01E-06 | 3.65E+00 |
| FHDC1                   | 2.03E-06 | 5.21E+00 |
| MUTYH                   | 2.03E-06 | 4.02E+00 |
| SEPTIN7P2               | 2.05E-06 | 3.58E+00 |
| GRAMD1B                 | 2.08E-06 | 5.55E+00 |
| GUSBP11                 | 2.10E-06 | 3.42E+00 |

|           |          |          |
|-----------|----------|----------|
| ENTPD1    | 2.10E-06 | 5.76E+00 |
| ZNF544    | 2.11E-06 | 2.49E+00 |
| TRAPPC2L  | 2.11E-06 | 2.85E+00 |
| CCL28     | 2.13E-06 | 2.59E+00 |
| ATAD2B    | 2.15E-06 | 3.06E+00 |
| MRPS11    | 2.16E-06 | 4.63E+00 |
| CHDH      | 2.18E-06 | 1.28E+01 |
| URB2      | 2.19E-06 | 2.52E+00 |
| N6AMT1    | 2.19E-06 | 7.39E+00 |
| FAM172A   | 2.22E-06 | 3.64E+00 |
| OLMALINC  | 2.23E-06 | 2.71E+00 |
| SIRT1     | 2.26E-06 | 2.92E+00 |
| ADCK1     | 2.26E-06 | 3.36E+00 |
| PANK1     | 2.29E-06 | 4.04E+00 |
| GRTP1     | 2.32E-06 | 3.62E+00 |
| CRISPLD2  | 2.34E-06 | 2.35E+00 |
| USP18     | 2.39E-06 | 4.10E+00 |
| F8        | 2.45E-06 | 4.91E+00 |
| IBA57     | 2.46E-06 | 3.06E+00 |
| PLCH1     | 2.47E-06 | 4.86E+00 |
| PWWP2A    | 2.48E-06 | 2.51E+00 |
| TNFRSF14  | 2.48E-06 | 5.94E+00 |
| KIAA0895  | 2.48E-06 | 2.84E+00 |
| MB        | 2.49E-06 | 1.70E+01 |
| ATXN7L2   | 2.49E-06 | 4.66E+00 |
| UBE2D4    | 2.49E-06 | 3.76E+00 |
| MPHOSPH10 | 2.51E-06 | 3.18E+00 |
| RNF113A   | 2.51E-06 | 2.76E+00 |
| IFT27     | 2.56E-06 | 3.04E+00 |
| PUSL1     | 2.56E-06 | 2.73E+00 |
| ZBED3     | 2.57E-06 | 3.62E+00 |
| BMP2K     | 2.60E-06 | 3.72E+00 |
| MIS18A    | 2.62E-06 | 2.50E+00 |
| CYB5D1    | 2.63E-06 | 3.59E+00 |
| ILKAP     | 2.63E-06 | 2.74E+00 |
| WWOX      | 2.63E-06 | 3.89E+00 |
| TSPAN10   | 2.67E-06 | 1.03E+01 |
| RAB20     | 2.68E-06 | 4.11E+00 |
| FIG4      | 2.68E-06 | 2.27E+00 |
| CASP8     | 2.68E-06 | 2.69E+00 |

|             |          |          |
|-------------|----------|----------|
| EPB41L4A    | 2.70E-06 | 5.81E+00 |
| FBF1        | 2.74E-06 | 2.63E+00 |
| JADE1       | 2.74E-06 | 3.54E+00 |
| PLPP5       | 2.75E-06 | 2.43E+00 |
| MED17       | 2.78E-06 | 2.74E+00 |
| SAP30       | 2.83E-06 | 4.28E+00 |
| MSANTD2     | 2.85E-06 | 4.15E+00 |
| PRR3        | 2.85E-06 | 2.93E+00 |
| CCDC90B     | 2.88E-06 | 2.99E+00 |
| PPAN-P2RY11 | 2.88E-06 | 7.19E+00 |
| FPGT        | 2.95E-06 | 3.28E+00 |
| CPPED1      | 2.97E-06 | 5.05E+00 |
| GPR160      | 2.98E-06 | 2.66E+00 |
| DNAAF2      | 3.00E-06 | 2.75E+00 |
| SANBR       | 3.02E-06 | 3.86E+00 |
| PARP3       | 3.04E-06 | 3.08E+00 |
| UVRAG       | 3.05E-06 | 2.49E+00 |
| ZNF524      | 3.08E-06 | 4.87E+00 |
| RABEP2      | 3.12E-06 | 2.86E+00 |
| NR1H3       | 3.14E-06 | 3.53E+00 |
| SMIM3       | 3.15E-06 | 3.31E+00 |
| IFT172      | 3.19E-06 | 3.37E+00 |
| ZNF45       | 3.21E-06 | 3.09E+00 |
| ADAL        | 3.27E-06 | 6.85E+00 |
| DMXL1       | 3.31E-06 | 3.03E+00 |
| LINC01224   | 3.31E-06 | 3.37E+00 |
| RGL3        | 3.32E-06 | 2.95E+01 |
| ZBTB18      | 3.32E-06 | 7.99E+00 |
| ZNF579      | 3.33E-06 | 5.37E+00 |
| VEPH1       | 3.35E-06 | 4.03E+00 |
| FCGBP       | 3.36E-06 | 4.94E+00 |
| MRNIP       | 3.44E-06 | 2.97E+00 |
| FAM161B     | 3.46E-06 | 3.97E+00 |
| RDH13       | 3.47E-06 | 2.43E+00 |
| TMEM126B    | 3.49E-06 | 2.68E+00 |
| HSD3B7      | 3.52E-06 | 6.00E+00 |
| BFSP1       | 3.55E-06 | 6.16E+00 |
| DNAJC30     | 3.56E-06 | 4.55E+00 |
| ALG13       | 3.58E-06 | 2.68E+00 |
| TMEM150A    | 3.60E-06 | 7.15E+00 |

|                 |          |          |
|-----------------|----------|----------|
| RABL2B          | 3.63E-06 | 2.58E+00 |
| EPC2            | 3.64E-06 | 2.31E+00 |
| SRSF8           | 3.65E-06 | 3.71E+00 |
| TMC5            | 3.66E-06 | 5.92E+00 |
| LINC01128       | 3.67E-06 | 2.75E+00 |
| ZNF776          | 3.67E-06 | 2.36E+00 |
| KLF11           | 3.67E-06 | 9.69E+00 |
| OVCA2           | 3.69E-06 | 2.55E+00 |
| ENSG00000232098 | 3.74E-06 | 2.91E+00 |
| RNF214          | 3.75E-06 | 2.68E+00 |
| PCDHB9          | 3.75E-06 | 4.59E+00 |
| IL17RE          | 3.83E-06 | 3.94E+00 |
| ABCA12          | 3.83E-06 | 8.98E+00 |
| CYB561D1        | 3.86E-06 | 2.42E+00 |
| ZBTB8A          | 3.86E-06 | 2.81E+00 |
| TCEAL1          | 3.87E-06 | 3.82E+00 |
| NPAT            | 3.87E-06 | 2.45E+00 |
| RGMB            | 3.92E-06 | 2.75E+00 |
| PPARGC1B        | 3.93E-06 | 2.76E+00 |
| PMS1            | 3.95E-06 | 3.40E+00 |
| AADAT           | 3.95E-06 | 3.92E+00 |
| SLFN13          | 3.98E-06 | 2.35E+00 |
| RPP40           | 4.00E-06 | 4.46E+00 |
| ZNF587          | 4.02E-06 | 2.27E+00 |
| TRIM45          | 4.02E-06 | 5.18E+00 |
| BCS1L           | 4.08E-06 | 3.29E+00 |
| RABIF           | 4.09E-06 | 3.48E+00 |
| CAPN7           | 4.10E-06 | 2.37E+00 |
| KIAA1958        | 4.13E-06 | 3.03E+00 |
| HEATR3          | 4.20E-06 | 2.75E+00 |
| ENSG00000279207 | 4.26E-06 | 3.14E+00 |
| ECHDC2          | 4.29E-06 | 2.21E+00 |
| DUXAP8          | 4.30E-06 | 3.50E+00 |
| CKMT1B          | 4.40E-06 | 4.15E+00 |
| UBXN11          | 4.41E-06 | 3.40E+00 |
| PDIK1L          | 4.48E-06 | 5.28E+00 |
| LNP1            | 4.49E-06 | 4.57E+00 |
| ZNF649          | 4.49E-06 | 6.24E+00 |
| ZNF428          | 4.50E-06 | 3.46E+00 |
| ENSG00000288884 | 4.50E-06 | 3.40E+00 |



|                 |          |          |
|-----------------|----------|----------|
| GCAT            | 4.51E-06 | 5.45E+00 |
| PRSS16          | 4.53E-06 | 2.14E+00 |
| RIOK2           | 4.57E-06 | 4.06E+00 |
| ATG4A           | 4.63E-06 | 4.29E+00 |
| GLIDR           | 4.64E-06 | 4.05E+00 |
| XPNPEP3         | 4.68E-06 | 2.31E+00 |
| SLC25A4         | 4.68E-06 | 2.41E+00 |
| BPHL            | 4.69E-06 | 2.72E+00 |
| CCNQ            | 4.85E-06 | 2.46E+00 |
| CMTM8           | 4.90E-06 | 3.71E+00 |
| TRPM2           | 4.91E-06 | 3.37E+00 |
| FMC1            | 4.91E-06 | 4.85E+00 |
| ENSG00000272512 | 4.93E-06 | 4.33E+00 |
| POP5            | 4.98E-06 | 3.46E+00 |
| PHTF1           | 4.98E-06 | 2.85E+00 |
| NHEJ1           | 4.98E-06 | 3.97E+00 |
| TIRAP           | 5.06E-06 | 3.90E+00 |
| IL1R1           | 5.07E-06 | 2.94E+00 |
| ZNF329          | 5.09E-06 | 2.65E+00 |
| ST7L            | 5.14E-06 | 3.54E+00 |
| ZW10            | 5.15E-06 | 2.89E+00 |
| WDR7            | 5.17E-06 | 2.76E+00 |
| PASK            | 5.17E-06 | 2.44E+00 |
| ENSG00000274173 | 5.17E-06 | 4.19E+00 |
| SLC29A2         | 5.17E-06 | 4.08E+00 |
| PRXL2B          | 5.19E-06 | 5.59E+00 |
| ASNSD1          | 5.29E-06 | 3.21E+00 |
| PMVK            | 5.30E-06 | 2.79E+00 |
| DNAJC22         | 5.30E-06 | 1.01E+01 |
| ZNF354A         | 5.32E-06 | 3.06E+00 |
| ACOT13          | 5.42E-06 | 2.33E+00 |
| AARS2           | 5.47E-06 | 2.26E+00 |
| TPMT            | 5.69E-06 | 2.13E+00 |
| TTC38           | 5.69E-06 | 2.94E+00 |
| CAPN8           | 5.72E-06 | 5.92E+00 |
| LAMA4           | 5.72E-06 | 5.07E+00 |
| CDKN2D          | 5.75E-06 | 2.37E+00 |
| CUTALP          | 5.77E-06 | 3.53E+00 |
| SLC25A19        | 5.92E-06 | 3.00E+00 |
| TMEM50B         | 6.05E-06 | 2.42E+00 |

|             |          |          |
|-------------|----------|----------|
| CAB39L      | 6.05E-06 | 3.31E+00 |
| BARX2       | 6.05E-06 | 3.16E+00 |
| LINC01133   | 6.06E-06 | 4.28E+00 |
| MTARC2      | 6.06E-06 | 2.63E+00 |
| VPS9D1      | 6.13E-06 | 2.53E+00 |
| YJU2B       | 6.13E-06 | 2.41E+00 |
| CDC7        | 6.15E-06 | 2.47E+00 |
| TATDN3      | 6.16E-06 | 5.00E+00 |
| ZNF750      | 6.29E-06 | 4.90E+00 |
| AFG3L1P     | 6.32E-06 | 3.29E+00 |
| EIF2B4      | 6.33E-06 | 2.20E+00 |
| CKMT1A      | 6.34E-06 | 3.28E+00 |
| CADM4       | 6.36E-06 | 4.49E+00 |
| METTL8      | 6.40E-06 | 2.72E+00 |
| ZNF827      | 6.41E-06 | 2.39E+00 |
| ARRDC3      | 6.45E-06 | 3.91E+00 |
| RANBP10     | 6.45E-06 | 2.28E+00 |
| INTS4       | 6.48E-06 | 2.29E+00 |
| HFE         | 6.52E-06 | 2.72E+00 |
| OSER1-DT    | 6.53E-06 | 4.94E+00 |
| MRM3        | 6.54E-06 | 2.55E+00 |
| ICAM3       | 6.54E-06 | 3.99E+00 |
| BBOF1       | 6.63E-06 | 5.49E+00 |
| ATP2C2      | 6.63E-06 | 7.69E+00 |
| C1orf210    | 6.70E-06 | 5.91E+00 |
| GET1        | 6.84E-06 | 2.33E+00 |
| GON7        | 6.99E-06 | 3.69E+00 |
| IQGAP2      | 7.01E-06 | 7.71E+00 |
| TEN1        | 7.01E-06 | 2.81E+00 |
| EGFL7       | 7.01E-06 | 8.81E+00 |
| ZNF117      | 7.03E-06 | 3.77E+00 |
| DOLPP1      | 7.08E-06 | 2.24E+00 |
| ARPIN-AP3S2 | 7.10E-06 | 2.66E+00 |
| EPC1        | 7.15E-06 | 3.52E+00 |
| PGAP1       | 7.17E-06 | 2.77E+00 |
| HDAC4       | 7.21E-06 | 2.97E+00 |
| SMIM12      | 7.30E-06 | 2.23E+00 |
| ZNF627      | 7.30E-06 | 4.89E+00 |
| TSHZ1       | 7.30E-06 | 2.80E+00 |
| LINC00662   | 7.32E-06 | 2.41E+00 |

|           |          |          |
|-----------|----------|----------|
| CASP10    | 7.36E-06 | 3.83E+00 |
| STRA6     | 7.38E-06 | 2.74E+00 |
| MACO1     | 7.42E-06 | 2.37E+00 |
| SLC4A11   | 7.50E-06 | 2.21E+00 |
| C1orf50   | 7.52E-06 | 3.25E+00 |
| SLC13A3   | 7.54E-06 | 4.23E+00 |
| PNKP      | 7.66E-06 | 2.24E+00 |
| RBMXL1    | 7.72E-06 | 3.03E+00 |
| SP4       | 7.74E-06 | 2.52E+00 |
| ALG6      | 7.76E-06 | 3.28E+00 |
| CFD       | 7.78E-06 | 1.11E+01 |
| TFPT      | 7.81E-06 | 2.85E+00 |
| PCBP1-AS1 | 7.89E-06 | 6.45E+00 |
| B4GALNT3  | 7.93E-06 | 2.64E+00 |
| ALKBH2    | 7.98E-06 | 2.89E+00 |
| ZNF276    | 8.08E-06 | 2.14E+00 |
| ZNF74     | 8.09E-06 | 2.70E+00 |
| KIF27     | 8.11E-06 | 3.78E+00 |
| RIMS3     | 8.12E-06 | 2.60E+00 |
| CRYBB2P1  | 8.13E-06 | 3.19E+00 |
| SBDSP1    | 8.37E-06 | 3.21E+00 |
| DOK3      | 8.51E-06 | 3.71E+00 |
| KLHL18    | 8.55E-06 | 2.40E+00 |
| TMEM254   | 8.66E-06 | 3.79E+00 |
| TIMM21    | 8.71E-06 | 2.68E+00 |
| CROCCP2   | 8.72E-06 | 2.30E+00 |
| RHBDD3    | 8.74E-06 | 2.30E+00 |
| GTF2IP13  | 8.82E-06 | 2.98E+00 |
| PRR19     | 8.85E-06 | 4.89E+00 |
| PGGT1B    | 8.91E-06 | 3.53E+00 |
| KYAT3     | 8.91E-06 | 2.33E+00 |
| TLR5      | 8.92E-06 | 5.89E+00 |
| PLSCR4    | 9.03E-06 | 2.47E+00 |
| ANKMY1    | 9.04E-06 | 3.40E+00 |
| KLHL22    | 9.07E-06 | 2.02E+00 |
| AK9       | 9.14E-06 | 3.46E+00 |
| NBPF12    | 9.22E-06 | 2.09E+00 |
| DUS3L     | 9.22E-06 | 2.74E+00 |
| NUDT12    | 9.26E-06 | 3.72E+00 |
| STK16     | 9.27E-06 | 2.09E+00 |

|            |          |          |
|------------|----------|----------|
| PLCE1      | 9.31E-06 | 3.11E+00 |
| RBBP8NL    | 9.36E-06 | 6.62E+00 |
| ERVK13-1   | 9.37E-06 | 3.22E+00 |
| GCHFR      | 9.39E-06 | 4.69E+00 |
| YY2        | 9.44E-06 | 4.22E+00 |
| TMEM218    | 9.44E-06 | 3.93E+00 |
| DNAJC6     | 9.53E-06 | 4.43E+00 |
| POLI       | 9.64E-06 | 2.42E+00 |
| RNF14      | 9.69E-06 | 2.25E+00 |
| GBAP1      | 9.70E-06 | 6.21E+00 |
| ASB16-AS1  | 9.70E-06 | 3.06E+00 |
| AEN        | 9.79E-06 | 2.80E+00 |
| FTX        | 9.84E-06 | 2.43E+00 |
| TSPYL5     | 9.87E-06 | 5.88E+00 |
| LRIG2      | 9.89E-06 | 2.15E+00 |
| NRAV       | 9.92E-06 | 4.40E+00 |
| PAQR6      | 1.01E-05 | 4.26E+00 |
| ALS2       | 1.01E-05 | 2.25E+00 |
| ZNF417     | 1.03E-05 | 2.40E+00 |
| ARV1       | 1.03E-05 | 2.46E+00 |
| RNF25      | 1.04E-05 | 3.17E+00 |
| LRATD1     | 1.05E-05 | 7.59E+00 |
| CICP14     | 1.05E-05 | 3.08E+00 |
| IGFBP2     | 1.05E-05 | 3.62E+00 |
| ZNF606     | 1.05E-05 | 2.71E+00 |
| ELP6       | 1.06E-05 | 3.39E+00 |
| PABIR1     | 1.06E-05 | 2.51E+00 |
| HYAL3      | 1.06E-05 | 2.54E+00 |
| NIPSNAP3A  | 1.07E-05 | 2.58E+00 |
| SLC40A1    | 1.07E-05 | 8.20E+00 |
| MGST2      | 1.08E-05 | 2.51E+00 |
| UMAD1      | 1.08E-05 | 2.36E+00 |
| C2orf15    | 1.09E-05 | 3.88E+00 |
| SLC25A20   | 1.09E-05 | 3.68E+00 |
| IFT46      | 1.09E-05 | 3.94E+00 |
| CBX8       | 1.09E-05 | 3.69E+00 |
| ZNF497     | 1.11E-05 | 5.60E+00 |
| AP4B1      | 1.11E-05 | 2.76E+00 |
| FAM126B    | 1.12E-05 | 3.54E+00 |
| ENTPD1-AS1 | 1.12E-05 | 4.28E+00 |

|                        |          |          |
|------------------------|----------|----------|
| RNF115                 | 1.13E-05 | 2.20E+00 |
| PCCA-DT                | 1.15E-05 | 3.37E+00 |
| AP4M1                  | 1.15E-05 | 2.73E+00 |
| DTX2P1-UPK3BP1-PMS2P11 | 1.17E-05 | 3.15E+00 |
| EEF2KMT                | 1.18E-05 | 2.38E+00 |
| TDRKH                  | 1.18E-05 | 3.11E+00 |
| PSCA                   | 1.19E-05 | 3.94E+00 |
| TBCEL                  | 1.19E-05 | 2.95E+00 |
| ENPP4                  | 1.19E-05 | 2.58E+00 |
| ZNF529                 | 1.19E-05 | 2.76E+00 |
| ANKRD54                | 1.20E-05 | 2.06E+00 |
| INO80D                 | 1.20E-05 | 3.35E+00 |
| FANCE                  | 1.21E-05 | 2.43E+00 |
| ETFDH                  | 1.21E-05 | 2.40E+00 |
| AAMDC                  | 1.23E-05 | 3.89E+00 |
| FEM1A                  | 1.24E-05 | 2.53E+00 |
| BUD13                  | 1.24E-05 | 2.01E+00 |
| SAYS1                  | 1.25E-05 | 4.21E+00 |
| ARHGAP31               | 1.25E-05 | 2.35E+00 |
| LSM10                  | 1.25E-05 | 2.20E+00 |
| GAB1                   | 1.27E-05 | 2.78E+00 |
| DOCK8                  | 1.29E-05 | 7.11E+00 |
| GFOD2                  | 1.29E-05 | 2.03E+00 |
| ORC1                   | 1.30E-05 | 2.23E+00 |
| CDRT1                  | 1.30E-05 | 5.35E+00 |
| AZI2                   | 1.31E-05 | 2.08E+00 |
| TMTC4                  | 1.31E-05 | 2.66E+00 |
| FBXL17                 | 1.31E-05 | 2.90E+00 |
| BEND3                  | 1.32E-05 | 2.57E+00 |
| ZNF837                 | 1.32E-05 | 8.44E+00 |
| ACYP2                  | 1.33E-05 | 3.66E+00 |
| FNIP2                  | 1.36E-05 | 2.66E+00 |
| ZNF449                 | 1.36E-05 | 2.91E+00 |
| EXTL2                  | 1.37E-05 | 2.97E+00 |
| MCRIP2                 | 1.38E-05 | 2.18E+00 |
| GSDMC                  | 1.39E-05 | 2.47E+00 |
| IQANK1                 | 1.39E-05 | 3.27E+00 |
| ELF2                   | 1.39E-05 | 2.08E+00 |
| ANKMY2                 | 1.39E-05 | 2.44E+00 |
| ZFP1                   | 1.39E-05 | 3.09E+00 |

|                 |          |          |
|-----------------|----------|----------|
| H2BC5           | 1.40E-05 | 1.04E+01 |
| BICRAL          | 1.41E-05 | 2.04E+00 |
| DHRS4           | 1.44E-05 | 2.91E+00 |
| C7orf26         | 1.44E-05 | 2.26E+00 |
| GRHL3           | 1.48E-05 | 3.20E+00 |
| GABPB2          | 1.48E-05 | 4.23E+00 |
| ZGLP1           | 1.52E-05 | 7.01E+00 |
| RBAK            | 1.53E-05 | 2.39E+00 |
| SLC12A2-DT      | 1.56E-05 | 2.10E+00 |
| SLC25A35        | 1.56E-05 | 4.22E+00 |
| PGBD2           | 1.60E-05 | 3.67E+00 |
| GALNT11         | 1.60E-05 | 2.11E+00 |
| DPY19L3         | 1.60E-05 | 2.58E+00 |
| PRR15           | 1.60E-05 | 3.10E+00 |
| AMDHD2          | 1.60E-05 | 2.39E+00 |
| PCSK1N          | 1.62E-05 | 8.97E+00 |
| OGG1            | 1.62E-05 | 2.83E+00 |
| ZNF12           | 1.63E-05 | 2.07E+00 |
| ZNF443          | 1.68E-05 | 5.91E+00 |
| REEP1           | 1.69E-05 | 9.84E+00 |
| CSAD            | 1.69E-05 | 3.46E+00 |
| ZNF440          | 1.73E-05 | 2.28E+00 |
| ME3             | 1.73E-05 | 4.29E+00 |
| TCEANC2         | 1.73E-05 | 2.23E+00 |
| ENSG00000260121 | 1.74E-05 | 4.05E+00 |
| EME2            | 1.74E-05 | 2.20E+00 |
| H2BC20P         | 1.74E-05 | 3.98E+00 |
| SIAH1           | 1.75E-05 | 2.01E+00 |
| ZBTB14          | 1.75E-05 | 2.13E+00 |
| GTF2IRD2B       | 1.75E-05 | 3.12E+00 |
| ABHD14B         | 1.76E-05 | 2.30E+00 |
| KCNK5           | 1.76E-05 | 2.34E+00 |
| SCAMP1-AS1      | 1.77E-05 | 4.51E+00 |
| USP38           | 1.79E-05 | 2.38E+00 |
| CRTC1           | 1.81E-05 | 2.80E+00 |
| MLH1            | 1.81E-05 | 2.41E+00 |
| ELMOD3          | 1.81E-05 | 2.02E+00 |
| PGAP3           | 1.84E-05 | 2.22E+00 |
| ZIC5            | 1.87E-05 | 4.85E+00 |
| ZNF354C         | 1.89E-05 | 2.57E+00 |

|                 |          |          |
|-----------------|----------|----------|
| NUDT8           | 1.90E-05 | 4.96E+00 |
| COA5            | 1.90E-05 | 2.40E+00 |
| MED26           | 1.90E-05 | 2.36E+00 |
| WNK4            | 1.93E-05 | 4.15E+00 |
| MAD1L1          | 1.93E-05 | 2.22E+00 |
| ZNF433          | 1.93E-05 | 3.38E+00 |
| CCNE1           | 1.98E-05 | 3.85E+00 |
| CCNH            | 1.98E-05 | 2.53E+00 |
| ZBED6CL         | 2.02E-05 | 2.68E+00 |
| CTSF            | 2.02E-05 | 1.00E+01 |
| BORCS7          | 2.04E-05 | 2.46E+00 |
| ENSG00000288849 | 2.04E-05 | 3.92E+00 |
| HSD17B2         | 2.04E-05 | 9.63E+00 |
| TBC1D3L         | 2.05E-05 | 2.72E+00 |
| ACACB           | 2.05E-05 | 3.00E+00 |
| MINDY4          | 2.05E-05 | 3.47E+00 |
| CTSO            | 2.05E-05 | 5.34E+00 |
| TEN1-CDK3       | 2.06E-05 | 2.34E+00 |
| SRP19           | 2.06E-05 | 2.97E+00 |
| LRRC3           | 2.07E-05 | 8.19E+00 |
| FAM114A2        | 2.07E-05 | 2.56E+00 |
| TRAPPC13        | 2.08E-05 | 2.64E+00 |
| GCFC2           | 2.09E-05 | 2.30E+00 |
| LYSMD3          | 2.11E-05 | 3.55E+00 |
| COMTD1          | 2.11E-05 | 3.22E+00 |
| PIGM            | 2.11E-05 | 3.46E+00 |
| KCTD15          | 2.12E-05 | 4.42E+00 |
| RP9P            | 2.12E-05 | 2.85E+00 |
| ARRDC2          | 2.13E-05 | 2.72E+00 |
| CRACD           | 2.16E-05 | 2.78E+00 |
| TMEM198B        | 2.17E-05 | 2.86E+00 |
| NSUN4           | 2.17E-05 | 2.26E+00 |
| TNRC6C          | 2.19E-05 | 2.98E+00 |
| FXN             | 2.19E-05 | 2.88E+00 |
| TUBA5P          | 2.19E-05 | 7.95E+00 |
| EP400P1         | 2.25E-05 | 3.69E+00 |
| SGF29           | 2.26E-05 | 2.72E+00 |
| BDH2            | 2.27E-05 | 2.96E+00 |
| CTC1            | 2.29E-05 | 2.65E+00 |
| ENSG00000262160 | 2.29E-05 | 2.35E+00 |

|                 |          |          |
|-----------------|----------|----------|
| FASTKD1         | 2.29E-05 | 2.40E+00 |
| STMN3           | 2.29E-05 | 3.33E+00 |
| EXOC6           | 2.29E-05 | 2.68E+00 |
| TCN2            | 2.30E-05 | 3.45E+00 |
| COQ2            | 2.31E-05 | 2.01E+00 |
| SPATA33         | 2.32E-05 | 3.53E+00 |
| CTU2            | 2.32E-05 | 2.26E+00 |
| ZNF682          | 2.34E-05 | 3.63E+00 |
| PSMA3-AS1       | 2.34E-05 | 2.62E+00 |
| FAM185A         | 2.35E-05 | 3.09E+00 |
| ZNF875          | 2.35E-05 | 2.14E+00 |
| PPIAP22         | 2.35E-05 | 2.03E+00 |
| CNOT10          | 2.39E-05 | 2.11E+00 |
| DXO             | 2.39E-05 | 2.11E+00 |
| CSTF3           | 2.40E-05 | 2.13E+00 |
| ZNF700          | 2.42E-05 | 2.48E+00 |
| ZNF846          | 2.43E-05 | 4.79E+00 |
| WHRN            | 2.48E-05 | 3.82E+00 |
| ENSG00000285589 | 2.49E-05 | 2.78E+00 |
| AUNIP           | 2.53E-05 | 2.32E+00 |
| AMACR           | 2.55E-05 | 3.18E+00 |
| RNF121          | 2.55E-05 | 2.23E+00 |
| GIN52           | 2.57E-05 | 2.28E+00 |
| SETMAR          | 2.59E-05 | 7.90E+00 |
| SPINT1-AS1      | 2.59E-05 | 3.38E+00 |
| ZNF44           | 2.62E-05 | 3.71E+00 |
| CCDC15          | 2.62E-05 | 3.92E+00 |
| GNAO1           | 2.63E-05 | 2.89E+00 |
| ANKHD1-EIF4EBP3 | 2.64E-05 | 2.88E+00 |
| ENSG00000229689 | 2.64E-05 | 3.84E+00 |
| SALL2           | 2.65E-05 | 6.16E+00 |
| MAMDC4          | 2.66E-05 | 4.19E+00 |
| CLTCL1          | 2.66E-05 | 2.87E+00 |
| NHSL1           | 2.68E-05 | 2.30E+00 |
| ZNF407          | 2.70E-05 | 2.58E+00 |
| GAREM1          | 2.71E-05 | 3.23E+00 |
| MZF1            | 2.73E-05 | 2.68E+00 |
| SNHG15          | 2.74E-05 | 3.14E+00 |
| ZNF607          | 2.74E-05 | 2.10E+00 |
| ANGEL2          | 2.75E-05 | 2.07E+00 |



|                 |          |          |
|-----------------|----------|----------|
| ZNF260          | 2.78E-05 | 2.63E+00 |
| ZNF302          | 2.82E-05 | 2.97E+00 |
| NGEF            | 2.82E-05 | 3.75E+00 |
| NUP42           | 2.83E-05 | 2.37E+00 |
| PI4KAP2         | 2.90E-05 | 2.14E+00 |
| H2BC19P         | 2.90E-05 | 4.67E+00 |
| RHOA            | 2.91E-05 | 4.73E+00 |
| NT5C3A          | 2.94E-05 | 2.36E+00 |
| PDXP            | 2.96E-05 | 2.17E+00 |
| ZNF737          | 2.97E-05 | 3.91E+00 |
| NEU3            | 2.99E-05 | 2.68E+00 |
| KCTD21          | 3.00E-05 | 2.58E+00 |
| YBEY            | 3.04E-05 | 4.18E+00 |
| ENSG00000212978 | 3.06E-05 | 3.24E+00 |
| APBB3           | 3.07E-05 | 2.20E+00 |
| SUOX            | 3.07E-05 | 2.69E+00 |
| PRSS27          | 3.10E-05 | 5.13E+00 |
| ENSG00000273151 | 3.10E-05 | 4.08E+00 |
| CLYBL           | 3.12E-05 | 3.31E+00 |
| ILDR1           | 3.18E-05 | 2.88E+00 |
| RMI1            | 3.18E-05 | 2.22E+00 |
| TAF13           | 3.24E-05 | 2.81E+00 |
| ENSG00000277117 | 3.25E-05 | 3.79E+00 |
| HOMER1          | 3.25E-05 | 2.03E+00 |
| LINC00667       | 3.29E-05 | 2.01E+00 |
| CPE             | 3.30E-05 | 3.06E+00 |
| PSMC3IP         | 3.30E-05 | 2.95E+00 |
| AKTIP           | 3.31E-05 | 2.11E+00 |
| NEK11           | 3.32E-05 | 3.42E+00 |
| TMLHE           | 3.32E-05 | 3.01E+00 |
| ZNF786          | 3.33E-05 | 2.17E+00 |
| RGL1            | 3.36E-05 | 3.88E+00 |
| SURF2           | 3.39E-05 | 2.55E+00 |
| HCG18           | 3.39E-05 | 2.04E+00 |
| UGT1A6          | 3.40E-05 | 7.32E+00 |
| CFAP298-TCP10L  | 3.40E-05 | 5.44E+00 |
| SLC39A4         | 3.44E-05 | 6.17E+00 |
| OR7E14P         | 3.47E-05 | 4.80E+00 |
| ZNF138          | 3.48E-05 | 3.04E+00 |
| MYLIP           | 3.49E-05 | 2.57E+00 |

|                 |          |          |
|-----------------|----------|----------|
| TMED7-TICAM2    | 3.50E-05 | 2.38E+00 |
| STAG3L3         | 3.50E-05 | 2.92E+00 |
| PUS3            | 3.50E-05 | 4.14E+00 |
| KANSL1L         | 3.53E-05 | 3.41E+00 |
| TENT5B          | 3.59E-05 | 4.89E+00 |
| RIBC2           | 3.59E-05 | 4.69E+00 |
| ZNF202          | 3.64E-05 | 2.20E+00 |
| FAM225A         | 3.66E-05 | 4.23E+00 |
| TEX30           | 3.70E-05 | 2.55E+00 |
| C7orf25         | 3.71E-05 | 3.41E+00 |
| ZNF552          | 3.75E-05 | 3.25E+00 |
| ATP9B           | 3.77E-05 | 2.68E+00 |
| RRAGB           | 3.78E-05 | 3.19E+00 |
| SYNM            | 3.79E-05 | 3.74E+00 |
| B3GALNT1        | 3.81E-05 | 2.64E+00 |
| TMBIM4          | 3.81E-05 | 2.12E+00 |
| RAB19           | 3.81E-05 | 3.29E+00 |
| CARF            | 3.83E-05 | 4.48E+00 |
| USP32P3         | 3.85E-05 | 2.83E+00 |
| ENSG00000176593 | 3.86E-05 | 2.41E+00 |
| ZNF814          | 3.88E-05 | 2.42E+00 |
| PEX7            | 3.89E-05 | 2.93E+00 |
| MON1A           | 3.91E-05 | 2.36E+00 |
| PTMAP5          | 3.91E-05 | 2.51E+00 |
| RIPK1           | 3.91E-05 | 2.13E+00 |
| DYNC2LI1        | 3.91E-05 | 2.63E+00 |
| ENSG00000274276 | 3.92E-05 | 7.86E+00 |
| C2orf69         | 3.93E-05 | 2.71E+00 |
| ZNF844          | 3.93E-05 | 2.44E+00 |
| DHRS4L2         | 3.95E-05 | 2.72E+00 |
| RNASEH1-DT      | 3.97E-05 | 3.39E+00 |
| THEM4           | 3.97E-05 | 2.14E+00 |
| RPP25           | 4.01E-05 | 2.40E+00 |
| TXNDC16         | 4.01E-05 | 2.06E+00 |
| ZNF791          | 4.05E-05 | 2.09E+00 |
| ABCB6           | 4.05E-05 | 2.09E+00 |
| RUFY3           | 4.06E-05 | 2.12E+00 |
| MPV17L2         | 4.07E-05 | 2.12E+00 |
| SPC25           | 4.08E-05 | 3.36E+00 |
| NINL            | 4.10E-05 | 2.91E+00 |

|                 |          |          |
|-----------------|----------|----------|
| LINC01963       | 4.13E-05 | 2.89E+00 |
| SFXN2           | 4.16E-05 | 3.09E+00 |
| HSF4            | 4.16E-05 | 2.28E+00 |
| MAIP1           | 4.16E-05 | 2.32E+00 |
| CLK4            | 4.16E-05 | 2.80E+00 |
| UHRF1BP1L       | 4.17E-05 | 2.08E+00 |
| SLC18B1         | 4.17E-05 | 2.13E+00 |
| METTL4          | 4.21E-05 | 2.38E+00 |
| CFAP119         | 4.35E-05 | 3.45E+00 |
| MIR924HG        | 4.35E-05 | 3.58E+00 |
| ZNF836          | 4.38E-05 | 2.57E+00 |
| BACE1-AS        | 4.44E-05 | 3.50E+00 |
| TM7SF2          | 4.45E-05 | 2.09E+00 |
| EPM2AIP1        | 4.45E-05 | 2.95E+00 |
| C11orf98        | 4.45E-05 | 2.03E+00 |
| COQ8A           | 4.47E-05 | 2.21E+00 |
| BTBD9           | 4.49E-05 | 2.53E+00 |
| SEPTIN7P14      | 4.52E-05 | 3.83E+00 |
| ZNHIT2          | 4.53E-05 | 2.17E+00 |
| MARS2           | 4.53E-05 | 2.95E+00 |
| ENSG00000269825 | 4.53E-05 | 2.71E+00 |
| FKBP5           | 4.56E-05 | 2.05E+00 |
| ZNF599          | 4.58E-05 | 3.02E+00 |
| GGACT           | 4.69E-05 | 5.97E+00 |
| GLCCI1          | 4.74E-05 | 2.63E+00 |
| PHYKPL          | 4.80E-05 | 2.11E+00 |
| ZFP30           | 4.82E-05 | 2.16E+00 |
| PTS             | 4.82E-05 | 2.12E+00 |
| RSAD1           | 4.83E-05 | 2.13E+00 |
| ZNF181          | 4.83E-05 | 3.77E+00 |
| ACTR3B          | 4.86E-05 | 2.26E+00 |
| ZNF589          | 4.86E-05 | 3.22E+00 |
| IFT22           | 4.86E-05 | 2.22E+00 |
| WIP1            | 4.86E-05 | 2.84E+00 |
| EED             | 4.87E-05 | 2.02E+00 |
| PGPEP1          | 4.87E-05 | 2.46E+00 |
| ZNF436          | 4.87E-05 | 2.29E+00 |
| DUXAP9          | 4.94E-05 | 3.01E+00 |
| MIOS            | 4.96E-05 | 2.01E+00 |
| CWF19L2         | 5.12E-05 | 2.59E+00 |

|            |          |          |
|------------|----------|----------|
| ZNF586     | 5.14E-05 | 2.59E+00 |
| NFKBIL1    | 5.16E-05 | 2.59E+00 |
| REXO5      | 5.20E-05 | 2.53E+00 |
| PIAS2      | 5.22E-05 | 2.02E+00 |
| KRT8P12    | 5.28E-05 | 3.20E+00 |
| ZNF605     | 5.31E-05 | 2.27E+00 |
| ZNF519     | 5.36E-05 | 2.42E+00 |
| APTR       | 5.37E-05 | 2.87E+00 |
| MCAT       | 5.38E-05 | 2.78E+00 |
| TOE1       | 5.43E-05 | 4.17E+00 |
| ADIRF-AS1  | 5.51E-05 | 2.98E+00 |
| EFNA3      | 5.55E-05 | 4.65E+00 |
| HEXIM2     | 5.55E-05 | 3.42E+00 |
| ZSCAN31    | 5.58E-05 | 4.69E+00 |
| TIMM29     | 5.64E-05 | 2.45E+00 |
| ZNF493     | 5.64E-05 | 2.90E+00 |
| RNF227     | 5.64E-05 | 3.63E+00 |
| SCML2      | 5.66E-05 | 2.28E+00 |
| ZNF512     | 5.68E-05 | 2.23E+00 |
| SEC11C     | 5.74E-05 | 3.19E+00 |
| NDUFA6-DT  | 5.75E-05 | 3.03E+00 |
| ZNF616     | 5.79E-05 | 2.44E+00 |
| ZNF593     | 5.81E-05 | 2.24E+00 |
| ZNF471     | 5.83E-05 | 2.83E+00 |
| TIMM10B    | 5.83E-05 | 2.17E+00 |
| RP9        | 5.83E-05 | 2.16E+00 |
| DCAF17     | 5.84E-05 | 2.10E+00 |
| SLC1A1     | 5.87E-05 | 2.60E+00 |
| CCDC34     | 5.87E-05 | 2.21E+00 |
| PPARG      | 6.04E-05 | 2.60E+00 |
| DYRK1B     | 6.05E-05 | 2.83E+00 |
| NEMP2      | 6.20E-05 | 2.57E+00 |
| ZNF14      | 6.21E-05 | 2.41E+00 |
| ZNF558     | 6.25E-05 | 2.32E+00 |
| LDLRAD3    | 6.35E-05 | 2.37E+00 |
| ZNF204P    | 6.41E-05 | 2.40E+00 |
| CCDC125    | 6.41E-05 | 2.82E+00 |
| MMACHC     | 6.42E-05 | 2.88E+00 |
| P4HTM      | 6.42E-05 | 2.54E+00 |
| ZFAND2A-DT | 6.43E-05 | 3.13E+00 |

|                 |          |          |
|-----------------|----------|----------|
| TMEM251         | 6.43E-05 | 2.40E+00 |
| MIR1915HG       | 6.45E-05 | 2.28E+00 |
| CBR4            | 6.46E-05 | 3.09E+00 |
| GTF3C6          | 6.51E-05 | 2.23E+00 |
| LINC00467       | 6.56E-05 | 2.73E+00 |
| GDAP2           | 6.57E-05 | 2.06E+00 |
| SSBP2           | 6.57E-05 | 2.93E+00 |
| ACP3            | 6.61E-05 | 3.47E+00 |
| RBMX2           | 6.65E-05 | 2.09E+00 |
| AJM1            | 6.67E-05 | 3.78E+00 |
| FGGY            | 6.71E-05 | 2.88E+00 |
| ZNF653          | 6.73E-05 | 2.70E+00 |
| ATPCKMT         | 6.75E-05 | 2.26E+00 |
| U2AF1L4         | 6.78E-05 | 3.19E+00 |
| SWI5            | 6.80E-05 | 2.13E+00 |
| HLA-H           | 6.82E-05 | 2.99E+00 |
| TIMM8A          | 6.84E-05 | 2.36E+00 |
| PCLO            | 6.84E-05 | 2.95E+00 |
| FAM151B-DT      | 6.84E-05 | 2.33E+00 |
| B3GALT4         | 6.85E-05 | 3.67E+00 |
| TMEM238         | 6.94E-05 | 3.43E+00 |
| VRK2            | 6.95E-05 | 2.08E+00 |
| IPP             | 7.03E-05 | 2.26E+00 |
| ENSG00000257337 | 7.06E-05 | 3.33E+00 |
| HOXA5           | 7.10E-05 | 2.48E+00 |
| NOL3            | 7.13E-05 | 2.46E+00 |
| ACSF3           | 7.13E-05 | 2.26E+00 |
| SIK3            | 7.14E-05 | 2.04E+00 |
| SNRNP48         | 7.23E-05 | 2.05E+00 |
| ENSG00000273015 | 7.43E-05 | 3.79E+00 |
| C19orf44        | 7.44E-05 | 2.66E+00 |
| AGO3            | 7.48E-05 | 2.05E+00 |
| TYMSOS          | 7.48E-05 | 5.80E+00 |
| MBD5            | 7.52E-05 | 2.03E+00 |
| ZNF480          | 7.53E-05 | 2.09E+00 |
| MICU2           | 7.59E-05 | 2.19E+00 |
| ENSG00000230882 | 7.63E-05 | 1.24E+01 |
| ZNF397          | 7.67E-05 | 2.70E+00 |
| RYR1            | 7.69E-05 | 2.78E+00 |
| HGH1            | 7.70E-05 | 2.18E+00 |

|                 |          |          |
|-----------------|----------|----------|
| ENTPD2          | 7.73E-05 | 4.42E+00 |
| HAGHL           | 7.78E-05 | 2.19E+00 |
| DOP1A           | 7.79E-05 | 2.01E+00 |
| TIGAR           | 7.82E-05 | 3.31E+00 |
| ENSG00000269604 | 7.82E-05 | 2.03E+00 |
| ZNF91           | 7.93E-05 | 2.22E+00 |
| SLC6A17         | 7.95E-05 | 8.98E+00 |
| KBTBD4          | 8.05E-05 | 2.09E+00 |
| ZNF771          | 8.17E-05 | 4.57E+00 |
| PLEKHA8P1       | 8.24E-05 | 3.10E+00 |
| CSRNP1          | 8.25E-05 | 2.05E+00 |
| SNHG20          | 8.29E-05 | 3.22E+00 |
| MRPL22          | 8.29E-05 | 2.00E+00 |
| FAAP24          | 8.29E-05 | 3.29E+00 |
| ZNF429          | 8.32E-05 | 2.09E+00 |
| ACTR8           | 8.33E-05 | 2.11E+00 |
| CAMKMT          | 8.36E-05 | 3.42E+00 |
| NDUFA1          | 8.59E-05 | 2.72E+00 |
| CSAG3           | 8.62E-05 | 3.30E+00 |
| ZSCAN9          | 8.67E-05 | 2.18E+00 |
| SNX21           | 8.70E-05 | 2.50E+00 |
| SLC35B3         | 8.70E-05 | 2.03E+00 |
| SPRTN           | 8.73E-05 | 2.21E+00 |
| PPP1R3E         | 8.77E-05 | 2.29E+00 |
| BBS1            | 8.81E-05 | 2.05E+00 |
| TCAF1P1         | 8.85E-05 | 2.03E+00 |
| DNAH10OS        | 8.88E-05 | 3.64E+00 |
| CDK20           | 8.97E-05 | 2.49E+00 |
| ZBTB42          | 9.00E-05 | 2.69E+00 |
| SAMD10          | 9.03E-05 | 2.12E+00 |
| RAB40B          | 9.24E-05 | 2.44E+00 |
| FBXO4           | 9.25E-05 | 2.08E+00 |
| POLR3C          | 9.29E-05 | 2.10E+00 |
| GRB14           | 9.34E-05 | 4.24E+00 |
| ANKRD42         | 9.46E-05 | 2.17E+00 |
| ZNF816          | 9.47E-05 | 2.35E+00 |
| ZNF490          | 9.51E-05 | 3.42E+00 |
| CTSK            | 9.56E-05 | 3.45E+00 |
| CTNS            | 9.59E-05 | 2.02E+00 |
| ZNF615          | 9.69E-05 | 2.18E+00 |

|                 |          |          |
|-----------------|----------|----------|
| TRAF5           | 9.71E-05 | 2.00E+00 |
| ZNF124          | 9.74E-05 | 3.48E+00 |
| NFATC2          | 9.84E-05 | 4.15E+00 |
| DHRS11          | 9.90E-05 | 2.05E+00 |
| RBM34           | 9.99E-05 | 2.15E+00 |
| ALKBH7          | 1.01E-04 | 2.90E+00 |
| METTL21A        | 1.01E-04 | 2.04E+00 |
| ARHGAP24        | 1.02E-04 | 3.35E+00 |
| THOC5           | 1.02E-04 | 2.42E+00 |
| ENSG00000254837 | 1.03E-04 | 3.59E+00 |
| LMF1            | 1.03E-04 | 3.04E+00 |
| KLHL26          | 1.03E-04 | 2.29E+00 |
| ZNF785          | 1.07E-04 | 2.28E+00 |
| RNF216P1        | 1.08E-04 | 2.01E+00 |
| STRADB          | 1.09E-04 | 2.07E+00 |
| CDON            | 1.10E-04 | 3.30E+00 |
| RASA3           | 1.11E-04 | 2.29E+00 |
| PAXIP1-DT       | 1.11E-04 | 2.36E+00 |
| USP35           | 1.11E-04 | 2.14E+00 |
| ZNF234          | 1.11E-04 | 2.15E+00 |
| ZNF280C         | 1.12E-04 | 3.07E+00 |
| SLC22A20P       | 1.13E-04 | 3.27E+00 |
| ENSG00000280441 | 1.13E-04 | 2.20E+00 |
| PCSK6           | 1.14E-04 | 2.23E+00 |
| EDN2            | 1.14E-04 | 6.38E+00 |
| ANTKMT          | 1.15E-04 | 2.24E+00 |
| ENSG00000228463 | 1.15E-04 | 6.15E+00 |
| ZNF69           | 1.16E-04 | 2.53E+00 |
| CTC-338M12.4    | 1.17E-04 | 2.79E+00 |
| MTRES1          | 1.17E-04 | 2.84E+00 |
| FAM241B         | 1.17E-04 | 2.15E+00 |
| BTD             | 1.17E-04 | 2.16E+00 |
| ZFP69           | 1.17E-04 | 3.17E+00 |
| KCTD7           | 1.18E-04 | 2.55E+00 |
| RPGRIP1L        | 1.19E-04 | 2.42E+00 |
| ZNF784          | 1.19E-04 | 3.16E+00 |
| MFSD8           | 1.19E-04 | 2.16E+00 |
| IPO5P1          | 1.21E-04 | 2.83E+00 |
| ZNF33B          | 1.24E-04 | 2.79E+00 |
| APOLD1          | 1.25E-04 | 2.22E+00 |

|                 |          |          |
|-----------------|----------|----------|
| ARMCX5          | 1.25E-04 | 2.33E+00 |
| EXO5            | 1.26E-04 | 2.32E+00 |
| BBS4            | 1.27E-04 | 2.12E+00 |
| COLCA2          | 1.27E-04 | 3.53E+00 |
| ABHD13          | 1.27E-04 | 2.37E+00 |
| CCDC157         | 1.28E-04 | 4.13E+00 |
| SIAE            | 1.28E-04 | 2.45E+00 |
| MPP3            | 1.29E-04 | 2.41E+00 |
| CCNE2           | 1.30E-04 | 3.17E+00 |
| PARD6A          | 1.30E-04 | 5.52E+00 |
| STARD7-AS1      | 1.32E-04 | 2.93E+00 |
| LINC01547       | 1.34E-04 | 2.54E+00 |
| TRMO            | 1.35E-04 | 2.85E+00 |
| APIP            | 1.35E-04 | 2.10E+00 |
| ZNF774          | 1.35E-04 | 3.35E+00 |
| RTN4RL2         | 1.36E-04 | 3.85E+00 |
| TRIM2           | 1.37E-04 | 2.10E+00 |
| ZNF415          | 1.38E-04 | 2.15E+00 |
| FAM120C         | 1.40E-04 | 2.06E+00 |
| LRRC51          | 1.41E-04 | 2.95E+00 |
| CENPS           | 1.43E-04 | 2.27E+00 |
| DUSP23          | 1.44E-04 | 2.08E+00 |
| UBA6-DT         | 1.48E-04 | 2.31E+00 |
| TTC28-AS1       | 1.48E-04 | 2.22E+00 |
| ENSG00000280128 | 1.48E-04 | 2.63E+00 |
| LINC00265       | 1.49E-04 | 2.19E+00 |
| MVB12B          | 1.49E-04 | 2.35E+00 |
| SORBS2          | 1.50E-04 | 2.78E+00 |
| METAP1D         | 1.51E-04 | 2.58E+00 |
| ENSG00000288953 | 1.51E-04 | 2.79E+00 |
| STK32C          | 1.52E-04 | 2.44E+00 |
| MED7            | 1.52E-04 | 2.68E+00 |
| ZNF691          | 1.52E-04 | 2.11E+00 |
| PBLD            | 1.52E-04 | 3.30E+00 |
| ENSG00000277758 | 1.63E-04 | 2.62E+00 |
| TUSC1           | 1.63E-04 | 5.81E+00 |
| SMCO4           | 1.64E-04 | 5.02E+00 |
| TRIM52          | 1.65E-04 | 2.53E+00 |
| CENATAC         | 1.65E-04 | 2.10E+00 |
| GPR137C         | 1.67E-04 | 3.01E+00 |



|                 |          |          |
|-----------------|----------|----------|
| RAPGEF4         | 1.70E-04 | 2.45E+00 |
| ARMC7           | 1.70E-04 | 2.05E+00 |
| ZNF789          | 1.70E-04 | 2.73E+00 |
| FBXO43          | 1.71E-04 | 2.85E+00 |
| ABCF2-H2BE1     | 1.71E-04 | 2.61E+00 |
| ZNF232          | 1.75E-04 | 2.31E+00 |
| ZNF354B         | 1.78E-04 | 3.06E+00 |
| NUDT4B          | 1.78E-04 | 2.68E+00 |
| THNSL1          | 1.80E-04 | 2.50E+00 |
| HSD11B1L        | 1.82E-04 | 2.84E+00 |
| AKR1B15         | 1.83E-04 | 2.42E+00 |
| NPIPB15         | 1.85E-04 | 3.14E+00 |
| ZNF35           | 1.86E-04 | 2.96E+00 |
| MRPL39          | 1.86E-04 | 2.32E+00 |
| ZNF283          | 1.86E-04 | 2.38E+00 |
| ZNF684          | 1.87E-04 | 3.12E+00 |
| LINC00680       | 1.90E-04 | 3.44E+00 |
| ENSG00000289047 | 1.93E-04 | 2.20E+00 |
| CNPY4           | 1.95E-04 | 2.01E+00 |
| POGLUT1         | 1.96E-04 | 2.17E+00 |
| ZNF568          | 1.96E-04 | 3.02E+00 |
| EPOR            | 1.96E-04 | 2.64E+00 |
| FBXO31          | 1.97E-04 | 2.08E+00 |
| WNK3            | 1.98E-04 | 2.71E+00 |
| ANAPC1P2        | 1.99E-04 | 2.24E+00 |
| RGPD1           | 1.99E-04 | 2.57E+00 |
| TTC32           | 1.99E-04 | 3.00E+00 |
| ZNF18           | 2.01E-04 | 2.74E+00 |
| SIL1            | 2.02E-04 | 2.01E+00 |
| ZNF611          | 2.03E-04 | 2.19E+00 |
| HIBCH           | 2.03E-04 | 2.49E+00 |
| TMEM86A         | 2.04E-04 | 4.90E+00 |
| CCDC126         | 2.08E-04 | 2.66E+00 |
| DLX3            | 2.11E-04 | 2.52E+00 |
| ENSG00000227766 | 2.11E-04 | 2.97E+00 |
| ZNF66           | 2.12E-04 | 3.04E+00 |
| ZNF805          | 2.12E-04 | 2.43E+00 |
| ZNF398          | 2.13E-04 | 2.03E+00 |
| FAM241A         | 2.15E-04 | 2.04E+00 |
| PTCH1           | 2.15E-04 | 2.01E+00 |

|             |          |          |
|-------------|----------|----------|
| MBLAC2      | 2.15E-04 | 2.24E+00 |
| CRYZL2P     | 2.17E-04 | 2.05E+00 |
| LINC01003   | 2.17E-04 | 3.11E+00 |
| MRPS17      | 2.19E-04 | 2.04E+00 |
| ZMPSTE24-DT | 2.20E-04 | 4.80E+00 |
| FAM98C      | 2.22E-04 | 2.28E+00 |
| GLMN        | 2.24E-04 | 2.29E+00 |
| TRIM62      | 2.28E-04 | 2.17E+00 |
| ZNF17       | 2.29E-04 | 2.18E+00 |
| CENPBD1P    | 2.30E-04 | 2.19E+00 |
| MYL5        | 2.30E-04 | 3.07E+00 |
| SPATA2L     | 2.30E-04 | 2.42E+00 |
| THAP8       | 2.31E-04 | 2.45E+00 |
| MLYCD       | 2.32E-04 | 3.41E+00 |
| KHK         | 2.36E-04 | 2.23E+00 |
| ZNF577      | 2.40E-04 | 2.91E+00 |
| ZNF726      | 2.42E-04 | 2.83E+00 |
| ZNF93       | 2.43E-04 | 2.03E+00 |
| TMEM161B-DT | 2.43E-04 | 2.14E+00 |
| SERTAD1     | 2.47E-04 | 2.40E+00 |
| RBM45       | 2.48E-04 | 2.34E+00 |
| HECTD2      | 2.49E-04 | 2.62E+00 |
| ARSA        | 2.53E-04 | 2.04E+00 |
| EFNA4       | 2.59E-04 | 2.26E+00 |
| LIPT2       | 2.62E-04 | 2.64E+00 |
| KCNIP3      | 2.63E-04 | 2.78E+00 |
| ZNF333      | 2.64E-04 | 2.43E+00 |
| GATB        | 2.64E-04 | 2.34E+00 |
| SLC31A2     | 2.68E-04 | 3.13E+00 |
| C11orf1     | 2.77E-04 | 2.31E+00 |
| ROCK1P1     | 2.82E-04 | 2.88E+00 |
| ZNF70       | 2.85E-04 | 2.35E+00 |
| FGF1        | 2.90E-04 | 4.35E+00 |
| RNF223      | 2.92E-04 | 9.26E+00 |
| HABP4       | 2.94E-04 | 2.24E+00 |
| FAM13A      | 2.94E-04 | 2.15E+00 |
| LRRC37A3    | 2.96E-04 | 3.15E+00 |
| TMEM116     | 2.96E-04 | 2.71E+00 |
| GAS2L3      | 2.96E-04 | 2.16E+00 |
| TMEM126A    | 3.00E-04 | 2.07E+00 |

|                 |          |          |
|-----------------|----------|----------|
| PCED1B          | 3.02E-04 | 2.32E+00 |
| COMMD1          | 3.03E-04 | 2.03E+00 |
| POLR2J4         | 3.11E-04 | 2.35E+00 |
| CLBA1           | 3.12E-04 | 2.02E+00 |
| TMEM191A        | 3.16E-04 | 2.29E+00 |
| CASTOR2         | 3.16E-04 | 2.14E+00 |
| TCHH            | 3.19E-04 | 2.51E+00 |
| CHAC2           | 3.28E-04 | 3.89E+00 |
| SPRY1           | 3.30E-04 | 2.69E+00 |
| CCDC112         | 3.30E-04 | 2.36E+00 |
| CBR3            | 3.32E-04 | 2.02E+00 |
| CD27-AS1        | 3.47E-04 | 2.49E+00 |
| C4A             | 3.47E-04 | 6.68E+00 |
| PECR            | 3.50E-04 | 2.10E+00 |
| TSPOAP1         | 3.52E-04 | 2.50E+00 |
| TIGD7           | 3.53E-04 | 2.23E+00 |
| PNPLA3          | 3.55E-04 | 3.58E+00 |
| AGAP6           | 3.55E-04 | 2.87E+00 |
| OXNAD1          | 3.56E-04 | 2.28E+00 |
| ENSG00000261526 | 3.56E-04 | 2.70E+00 |
| ZNF564          | 3.58E-04 | 3.11E+00 |
| ENSG00000237807 | 3.61E-04 | 3.66E+00 |
| FBXL15          | 3.62E-04 | 2.10E+00 |
| ENSG00000260267 | 3.65E-04 | 2.54E+00 |
| MORN2           | 3.73E-04 | 2.08E+00 |
| TSHZ2           | 3.77E-04 | 2.32E+00 |
| ZNF439          | 3.78E-04 | 2.54E+00 |
| PRKAA2          | 3.87E-04 | 2.00E+00 |
| ABHD18          | 3.90E-04 | 2.22E+00 |
| PDPK2P          | 3.97E-04 | 2.39E+00 |
| C1orf56         | 3.99E-04 | 2.43E+00 |
| ASAH2B          | 4.02E-04 | 2.31E+00 |
| ZNF566          | 4.14E-04 | 2.39E+00 |
| WDR5B           | 4.14E-04 | 2.22E+00 |
| MAGI1           | 4.16E-04 | 2.22E+00 |
| SHROOM1         | 4.17E-04 | 2.38E+00 |
| ZNF8-DT         | 4.20E-04 | 2.99E+00 |
| ZNF799          | 4.30E-04 | 2.15E+00 |
| ENSG00000283189 | 4.37E-04 | 2.47E+00 |
| MEIS1           | 4.37E-04 | 2.04E+00 |

|             |          |          |
|-------------|----------|----------|
| ZNF862      | 4.53E-04 | 2.85E+00 |
| DECR2       | 4.56E-04 | 2.79E+00 |
| CYP4V2      | 4.56E-04 | 2.12E+00 |
| ZNF441      | 4.58E-04 | 2.29E+00 |
| ZSCAN5A     | 4.59E-04 | 2.41E+00 |
| GSTA4       | 4.60E-04 | 2.06E+00 |
| LRP5L       | 4.65E-04 | 2.28E+00 |
| GLB1L       | 4.65E-04 | 2.41E+00 |
| NOTCH2NLB   | 4.71E-04 | 2.21E+00 |
| BMPR1B      | 4.73E-04 | 2.54E+00 |
| ITPR1       | 4.74E-04 | 3.17E+00 |
| INSR        | 4.86E-04 | 6.06E+00 |
| FAM27C      | 4.89E-04 | 3.03E+00 |
| SH3RF3      | 4.97E-04 | 2.06E+00 |
| LCMT2       | 5.01E-04 | 2.44E+00 |
| ALDH3A1     | 5.03E-04 | 3.55E+00 |
| LRRC27      | 5.06E-04 | 2.47E+00 |
| ZNF613      | 5.10E-04 | 2.16E+00 |
| CSGALNACT1  | 5.13E-04 | 2.47E+00 |
| MTARC1      | 5.13E-04 | 2.11E+00 |
| MIR600HG    | 5.17E-04 | 2.45E+00 |
| KCTD14      | 5.19E-04 | 2.48E+00 |
| SMIM10L1    | 5.21E-04 | 2.31E+00 |
| ZBED8       | 5.32E-04 | 2.06E+00 |
| FBXO36      | 5.44E-04 | 2.80E+00 |
| EXOGL       | 5.47E-04 | 2.62E+00 |
| MMAA        | 5.54E-04 | 2.59E+00 |
| ZNF767P     | 5.71E-04 | 2.07E+00 |
| TCAIM       | 5.72E-04 | 2.43E+00 |
| DYNLT2B     | 5.72E-04 | 2.40E+00 |
| PELI2       | 5.82E-04 | 2.12E+00 |
| ABRAXAS1    | 5.97E-04 | 2.18E+00 |
| GPC2        | 6.12E-04 | 2.82E+00 |
| MORN1       | 6.34E-04 | 2.96E+00 |
| MZF1-AS1    | 6.38E-04 | 3.21E+00 |
| FIZ1        | 6.55E-04 | 2.22E+00 |
| HERPUD2-AS1 | 6.74E-04 | 2.23E+00 |
| BORCS6      | 6.76E-04 | 2.34E+00 |
| ZNF527      | 6.80E-04 | 3.17E+00 |
| KIAA1549    | 6.86E-04 | 2.05E+00 |

|                 |          |          |
|-----------------|----------|----------|
| MTHFD2L         | 6.89E-04 | 3.58E+00 |
| PCDHB14         | 6.97E-04 | 2.48E+00 |
| SMARCD3         | 7.07E-04 | 2.64E+00 |
| FBLN5           | 7.13E-04 | 2.54E+00 |
| ENSG00000272141 | 7.17E-04 | 3.19E+00 |
| WDPCP           | 7.25E-04 | 2.50E+00 |
| TTC30B          | 7.36E-04 | 2.12E+00 |
| RNFT2           | 7.41E-04 | 2.10E+00 |
| ARNTL           | 7.43E-04 | 2.05E+00 |
| C2orf74         | 7.49E-04 | 2.08E+00 |
| ENSG00000217801 | 7.51E-04 | 3.28E+00 |
| GIN1            | 7.57E-04 | 2.52E+00 |
| HOXC6           | 7.61E-04 | 2.02E+00 |
| FANCM           | 7.73E-04 | 2.07E+00 |
| ARHGAP11B       | 7.81E-04 | 2.96E+00 |
| ZNF425          | 8.01E-04 | 2.53E+00 |
| NOXA1           | 8.09E-04 | 2.83E+00 |
| DGAT2           | 8.15E-04 | 2.61E+00 |
| ENSG00000265690 | 8.28E-04 | 2.44E+00 |
| ALKBH8          | 8.53E-04 | 2.22E+00 |
| MAST1           | 8.54E-04 | 2.81E+00 |
| PPIAP31         | 8.68E-04 | 2.75E+00 |
| SORBS1          | 8.69E-04 | 2.30E+00 |
| HOXA-AS2        | 8.76E-04 | 2.03E+00 |
| ENSG00000256646 | 8.88E-04 | 2.50E+00 |
| KCNC4           | 9.07E-04 | 2.44E+00 |
| ZNF271P         | 9.08E-04 | 2.39E+00 |
| SMPD1           | 9.39E-04 | 2.06E+00 |
| EDN1            | 9.48E-04 | 3.58E+00 |
| ERICH5          | 9.59E-04 | 2.06E+00 |
| MESP1           | 9.60E-04 | 3.34E+00 |
| SPRYD4          | 9.61E-04 | 2.43E+00 |
| TBCE            | 9.77E-04 | 2.82E+00 |
| H2AC18          | 9.91E-04 | 3.05E+00 |
| ZNF688          | 1.01E-03 | 2.02E+00 |
| ZNF485          | 1.04E-03 | 2.37E+00 |
| C15orf62        | 1.04E-03 | 2.86E+00 |
| EBF4            | 1.05E-03 | 2.83E+00 |
| ENSG00000273066 | 1.06E-03 | 2.12E+00 |
| CCT6P3          | 1.10E-03 | 2.72E+00 |

|                 |          |          |
|-----------------|----------|----------|
| MAP10           | 1.13E-03 | 2.23E+00 |
| ANKRD34A        | 1.14E-03 | 2.51E+00 |
| DNLZ            | 1.14E-03 | 2.04E+00 |
| SLC25A21        | 1.14E-03 | 2.56E+00 |
| TBC1D22A-DT     | 1.16E-03 | 3.52E+00 |
| LINC01881       | 1.17E-03 | 2.25E+00 |
| DLG4            | 1.20E-03 | 2.18E+00 |
| SH3BP5-AS1      | 1.21E-03 | 2.50E+00 |
| LMNTD2          | 1.21E-03 | 2.39E+00 |
| GDPD1           | 1.24E-03 | 2.03E+00 |
| NPAS2           | 1.26E-03 | 3.70E+00 |
| IDUA            | 1.28E-03 | 2.03E+00 |
| ENSG00000285796 | 1.29E-03 | 2.36E+00 |
| ENSG00000247679 | 1.29E-03 | 2.66E+00 |
| C1QL1           | 1.29E-03 | 2.02E+00 |
| SLF1            | 1.37E-03 | 2.04E+00 |
| FAM161A         | 1.39E-03 | 2.10E+00 |
| CCDC18          | 1.40E-03 | 2.12E+00 |
| C5              | 1.46E-03 | 2.23E+00 |
| ENSG00000286431 | 1.46E-03 | 2.23E+00 |
| YAE1            | 1.46E-03 | 2.08E+00 |
| ZBTB26          | 1.46E-03 | 2.08E+00 |
| ENSG00000235859 | 1.48E-03 | 2.15E+00 |
| PLA2G6          | 1.48E-03 | 2.16E+00 |
| CCDC107         | 1.49E-03 | 2.13E+00 |
| APBA1           | 1.49E-03 | 2.93E+00 |
| MEF2B           | 1.52E-03 | 2.90E+00 |
| ZNF678          | 1.55E-03 | 2.10E+00 |
| ENSG00000272884 | 1.70E-03 | 2.54E+00 |
| EPHA4           | 1.74E-03 | 3.10E+00 |
| CLK1            | 1.74E-03 | 2.55E+00 |
| TRIM73          | 1.75E-03 | 2.32E+00 |
| ADAM22          | 1.79E-03 | 3.09E+00 |
| ZNF583          | 1.80E-03 | 2.30E+00 |
| LINC01588       | 1.80E-03 | 2.28E+00 |
| PBX3            | 1.83E-03 | 2.03E+00 |
| ZNF566-AS1      | 1.88E-03 | 2.64E+00 |
| RMDN2           | 1.92E-03 | 2.08E+00 |
| ENSG00000286129 | 1.95E-03 | 2.06E+00 |
| ZSCAN22         | 2.04E-03 | 2.18E+00 |

|                 |          |          |
|-----------------|----------|----------|
| ENSG00000269044 | 2.06E-03 | 2.04E+00 |
| RAB30-DT        | 2.10E-03 | 2.02E+00 |
| ZNF619          | 2.11E-03 | 2.24E+00 |
| CCDC22          | 2.15E-03 | 2.24E+00 |
| RIMS2           | 2.20E-03 | 2.81E+00 |
| LINC01270       | 2.24E-03 | 2.06E+00 |
| SDHAP3          | 2.27E-03 | 2.88E+00 |
| SLC27A5         | 2.33E-03 | 2.39E+00 |
| PDPR2P          | 2.35E-03 | 2.02E+00 |
| ZNF708          | 2.46E-03 | 2.09E+00 |
| MAML3           | 2.50E-03 | 2.37E+00 |
| TIGD3           | 2.51E-03 | 2.27E+00 |
| ZNF620          | 2.56E-03 | 2.13E+00 |
| STAG3L5P        | 2.58E-03 | 2.07E+00 |
| CGNL1           | 2.63E-03 | 2.64E+00 |
| ENSG00000279047 | 2.77E-03 | 8.38E+00 |
| ZNF20           | 2.81E-03 | 3.08E+00 |
| HSD17B6         | 2.86E-03 | 2.23E+00 |
| IQCH-AS1        | 2.93E-03 | 2.05E+00 |
| SBF2-AS1        | 3.13E-03 | 2.14E+00 |
| ENSG00000241489 | 3.15E-03 | 2.07E+00 |
| SOWAHB          | 3.26E-03 | 2.81E+00 |
| FMO4            | 3.40E-03 | 2.16E+00 |
| POLR3G          | 3.43E-03 | 2.19E+00 |
| KRT23           | 3.50E-03 | 3.33E+00 |
| SHANK2          | 3.60E-03 | 2.15E+00 |
| SMG1P7          | 3.65E-03 | 2.33E+00 |
| ZCWPW1          | 3.72E-03 | 2.24E+00 |
| ENSG00000288851 | 3.74E-03 | 2.20E+00 |
| ENSG00000283761 | 3.83E-03 | 2.44E+00 |
| DUSP19          | 3.98E-03 | 2.49E+00 |
| PLAAT3          | 4.07E-03 | 2.38E+00 |
| ZNF232-AS1      | 4.12E-03 | 2.16E+00 |
| ZNF503-AS2      | 4.34E-03 | 2.57E+00 |
| TMEM17          | 4.48E-03 | 2.25E+00 |
| ZNF460          | 4.77E-03 | 2.10E+00 |
| APBB1           | 5.14E-03 | 2.88E+00 |
| AADAC           | 5.41E-03 | 2.28E+00 |
| DISC1           | 5.42E-03 | 2.33E+00 |
| ENSG00000271793 | 5.67E-03 | 3.41E+00 |

|                 |          |          |
|-----------------|----------|----------|
| PTP4A3          | 5.68E-03 | 2.01E+00 |
| OVGP1           | 5.77E-03 | 2.32E+00 |
| MDP1            | 6.05E-03 | 2.82E+00 |
| NIFK-AS1        | 6.06E-03 | 2.10E+00 |
| PDCD6P1         | 6.09E-03 | 2.02E+00 |
| ST20            | 6.11E-03 | 2.08E+00 |
| ENSG00000275234 | 6.17E-03 | 2.01E+00 |
| ENSG00000289100 | 6.58E-03 | 3.04E+00 |
| ENSG00000215068 | 7.82E-03 | 2.05E+00 |
| TUBBP1          | 7.93E-03 | 2.20E+00 |
| PNMA2           | 8.31E-03 | 2.76E+00 |
| ULBP1           | 8.59E-03 | 2.02E+00 |
| ZNF345          | 8.94E-03 | 2.09E+00 |
| KRT8P3          | 9.02E-03 | 2.47E+00 |
| SMIM11          | 1.04E-02 | 2.26E+00 |
| ENSG00000280385 | 1.05E-02 | 2.12E+00 |
| CMPK2           | 1.07E-02 | 3.36E+00 |
| ENSG00000272916 | 1.28E-02 | 2.12E+00 |
| FRAT1           | 1.43E-02 | 2.31E+00 |
| NEURL3          | 1.46E-02 | 2.38E+00 |
| RPL10P16        | 1.91E-02 | 2.35E+00 |
| ENSG00000275807 | 2.05E-02 | 2.08E+00 |
| MTCO2P12        | 2.25E-02 | 2.03E+00 |
| ZNF8-ERVK3-1    | 2.37E-02 | 2.02E+00 |
| MTCO3P12        | 2.93E-02 | 2.16E+00 |
| MTND4P12        | 3.16E-02 | 2.14E+00 |
| ZNF709          | 4.00E-02 | 3.65E+00 |
| ENSG00000273590 | 4.11E-02 | 2.02E+00 |
| ENSG00000269693 | 4.45E-02 | 2.52E+00 |
